# Supplementary material for: Subgroup-Specific Cardiovascular Effects of Intensive Lifestyle Intervention: A Causal Forest Analysis in Adults with Type 2 Diabetes and Overweight/obesity
Source: Research Square preprint supplement (doi:10.21203/rs.3.rs-6186612/v1), 2025-05-15
Supplement: Supplementary file 1 [file e0f9781f17ab86e4ce84d554.docx]

**Supplementary material**

**Figure S1.** Flow diagram for selection of study population.

**Figure S2.** The incidence estimates for the primary and three secondary outcomes among four subgroups identified by the casual forest model.

**Table S1.** Baseline characteristics of the excluded and included participants.

**Table S2.** The 42 variables used for constructing causal forest model.

**Table S3.** Baseline characteristics of the 4710 individuals before and after imputation of missing data.

**Table S4.** Baseline characteristics of participants between the ILI and DSE groups.

**Table S5.** Risk of primary and three secondary outcomes for the ILI vs. DSE groups in overweight or obese participants with type 2 diabetes.

**Table S6.** Risk of primary and secondary cardiovascular outcomes across four subgroups identified by the causal forest model.

**Table S7.** Baseline characteristics of participants in the ILI and DSE arms within Subgroups 1 to 3.

**Table S8.** Risk of primary and three secondary outcomes for ILI vs. DSE within each subgroup identified by the causal forest model after excluding those with a history of CVD at baseline (n=4050).

**Figure S1.** Flow diagram for selection of study population.


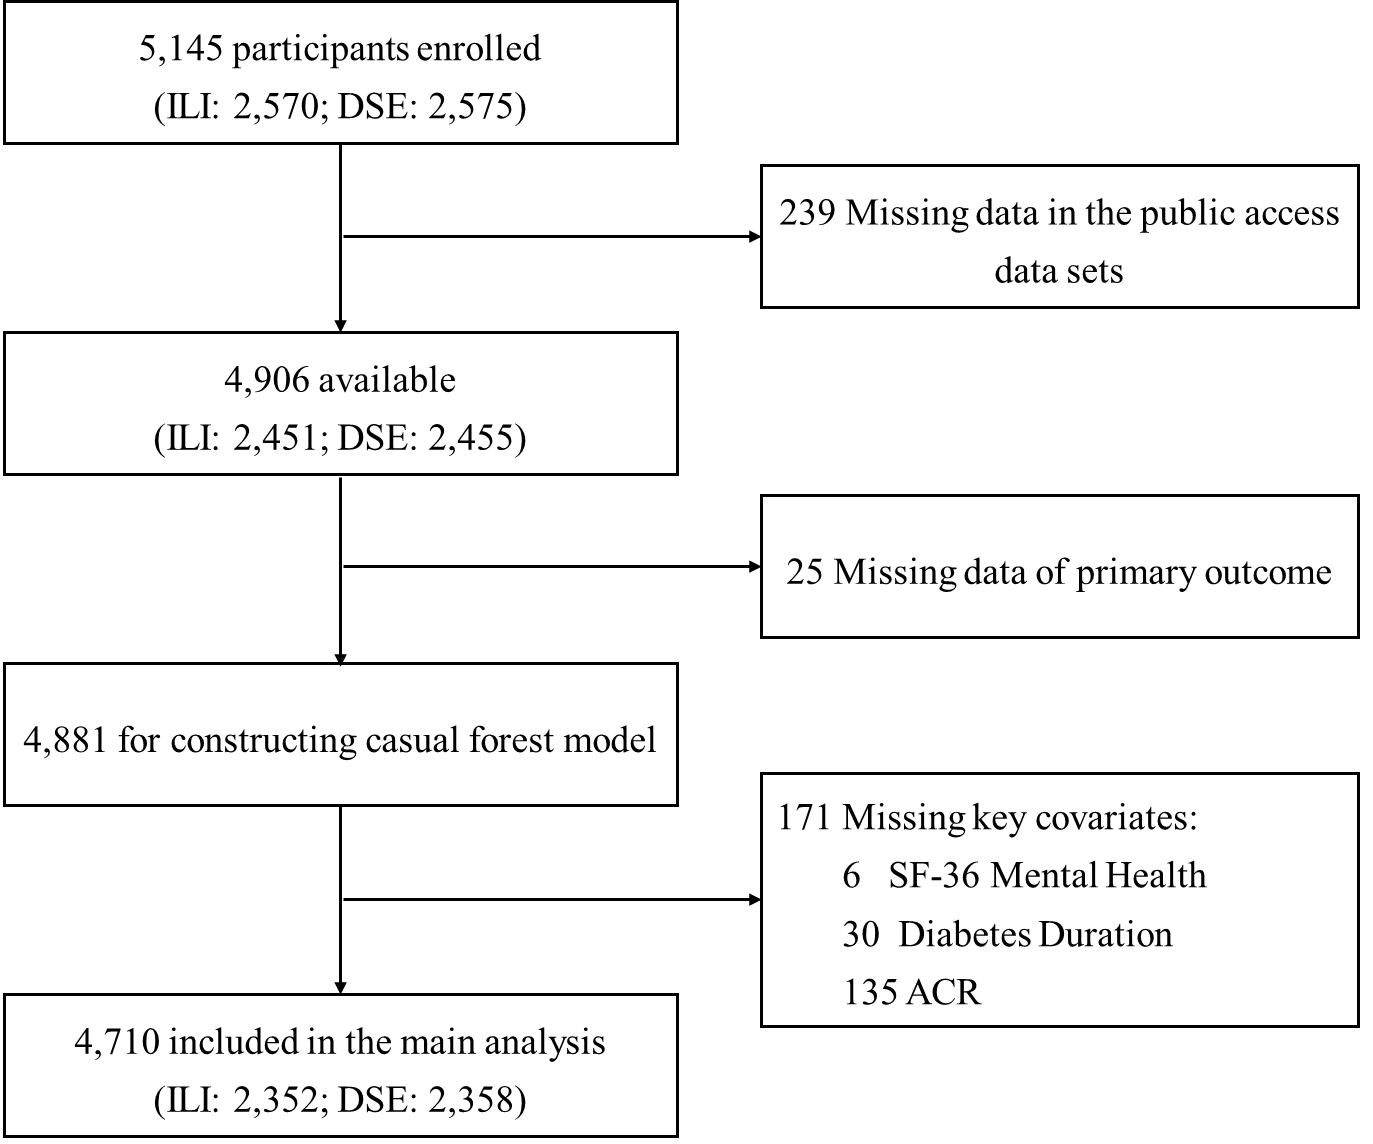


ILI: intensive lifestyle intervention; DSE: diabetes support and education; SF-36: short form (36) health survey; ACR: albumin-creatinine ratio.

**Figure S2.** The incidence estimates for the primary and three secondary outcomes among four subgroups identified by the casual forest model.


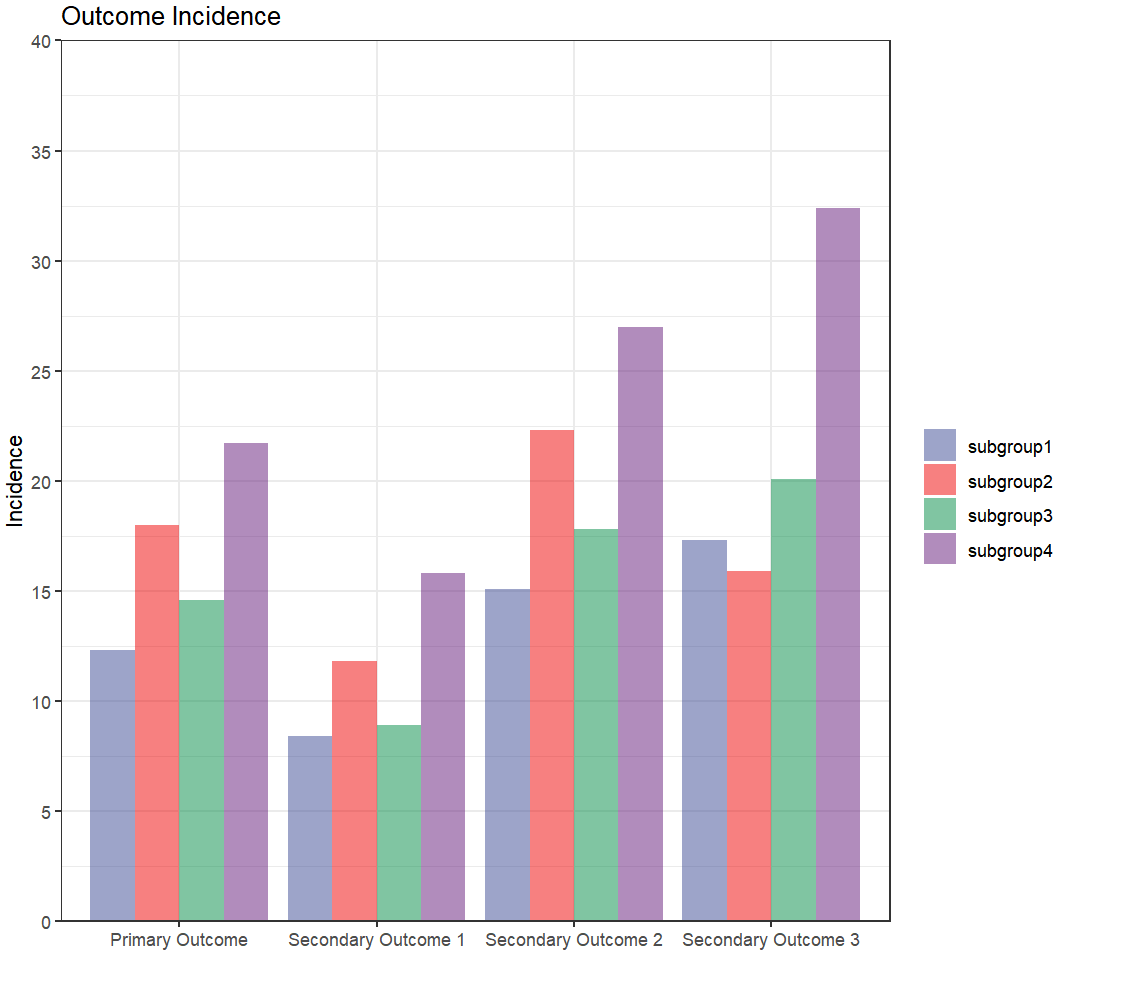


Subgroup 1: SF-36 Mental Health ≤ 55.64 and Diabetes Duration ≤ 4 years; Subgroup 2: SF-36 Mental Health ≤ 55.64 and Diabetes Duration > 4 years; Subgroup 3: SF-36 Mental Health > 55.64 and ACR ≤ 10 mg/g; Subgroup 4: SF-36 Mental Health > 55.64 and ACR > 10 mg/g.

| **Table S1.** Characteristics of the included and excluded participants at baseline. | | | |
| --- | --- | --- | --- |
| **Variables** | Excluded Participants  (N=171) | Included Participants  (N=4710) | *P* value |
| Age, years | 60.6 (6.9) | 58.9 (6.8) | 0.001 |
| Female, n (%) | 101 (59.1) | 2757 (58.5) | 0.953 |
| Race, n (%) |  |  | 0.019 |
| White | 125 (73.1) | 3110 (66.0) |  |
| Black (not Hispanic) | 28 (16.4) | 770 (16.3) |  |
| Hispanic | 10 (5.8) | 664 (14.1) |  |
| Other/Mixed | 8 (4.7) | 166 (3.5) |  |
| Education, n (%) |  |  | 0.719 |
| ＜13 years | 32 (19.2) | 896 (19.4) |  |
| 13-16 years | 58 (34.7) | 1729 (37.5) |  |
| ≥16years | 77 (46.1) | 1990 (43.1) |  |
| Income, n (%) |  |  | 0.072 |
| < $20K | 20 (14.1) | 481 (11.3) |  |
| $20K - $40K | 34 (23.9) | 893 (21.0) |  |
| $40K - $60K | 37 (26.1) | 868 (20.4) |  |
| $60K - $80K | 22 (15.5) | 706 (16.6) |  |
| BMI, kg/m2 | 35.4 (5.6) | 36.0(5.9) | 0.302 |
| Waist circumference, cm | 113.1 (13.8) | 114.0 (14.0) | 0.501 |
| SBP, mmHg | 132.1 (19.2) | 129.0 (17.1) | 0.036 |
| DBP, mmHg | 71.3 (10.4) | 70.2 (9.6) | 0.176 |
| Smoking, n (%) |  |  | 0.573 |
| Never | 78 (46.2) | 2340 (49.8) |  |
| Former smoker | 82 (48.5) | 2162 (46.0) |  |
| Current smoker | 9 (5.3) | 199 (4.2) |  |
| Alcohol, n (%) |  |  | 0.976 |
| Never | 115 (67.3) | 3148 (66.8) |  |
| ≥1g/week | 56 (32.7) | 1562 (33.2) |  |
| HbA1c, % | 7.1 (1.2) | 7.3 (1.2) | 0.140 |
| HDL-c, mg/dl | 42.6 (10.2) | 43.5 (11.9) | 0.386 |
| LDL-c, mg/dl | 111.5 (36.8) | 112.7 (32.1) | 0.181 |
| Creatinine, mg/dl | 0.8 (0.2) | 0.8 (0.2) | 0.410 |
| Hypertension, n (%) | 150 (87.7) | 3943 (83.7) | 0.196 |
| CVD, n (%) | 28 (16.4) | 660 (14.0) | 0.447 |
| Dyslipidemia, n (%) | 114 (66.7) | 3325 (70.6) | 0.307 |
| ACR, mg/g | 1.5 (2.1) | 4.3 (20.3) | 0.471 |
| ABI | 1.2 (0.1) | 1.2 (0.1) | 0.920 |
| Diabetes Duration, years | 6.6 (5.9) | 6.7 (6.4) | 0.818 |
| Continuous and categorical variables are presented as mean (SD) and number (%), respectively.  BMI: body mass index; SBP: systolic blood pressure; DBP: diastolic blood pressure; HbA1c: glycosylated hemoglobin; HDL-c: high-density lipoprotein cholesterol; LDL-c: low-density lipoprotein cholesterol; CVD: cardiovascular disease; ACR: albumin-creatinine ratio; ABI: ankle brachial index; SD: standard deviation. | | | |

| **Table S2.** The 42 variables used for constructing causal forest model. | |
| --- | --- |
| **Variable type (n)** | Detailed variables |
| **Demographic Variables (5)** | age, gender, race, education, income |
| **Physiological and Biomarker Variables (10)** | BMI, weight, height, mean waist circumstance, SBP, DBP, beck total score, ABI, beck total score (entered at clinic), maximal MET value |
| **Lifestyle Factors (3)** | Smoking, alcohol, times per week sweat exercise |
| **Laboratory Test Indicators (10)** | blood glucose, HbA1c, total cholesterol, HDL-c, LDL-c, triglycerides, creatinine, urine albumin, urine creatinine, ACR |
| **Medical History (7)** | CVD history, HF history, diabetes duration, dyslipidemia, metabolic syndrome, diabetes severity, age diagnosed with diabetes |
| **SF-36 Measurement Scale (7)** | SF-36 mental health, SF-36 Reported Health Transition, SF-36 mental component summary, SF-36 general health, SF-36 physical component summary, SF-36 physical functioning, SF-36 social functioning |
| n = Number of variables; BMI: body mass index; SBP: systolic blood pressure; DBP: diastolic blood pressure; MET: metabolic equivalent of task; ABI: ankle brachial index; HbA1c: glycosylated hemoglobin; HDL-c: high-density lipoprotein cholesterol; LDL-c: low-density lipoprotein cholesterol; ACR: albumin-creatinine ratio; CVD: cardiovascular disease; HF: heart failure; SF-36: short form (36) health survey. | |

| **Table S3.** Baseline characteristics of the 4710 individuals before and after imputation of missing data. | | | |
| --- | --- | --- | --- |
| **Variables** | Before Imputation | After Imputation | *P* value |
| Age, years | 58.9 (6.8) | 58.9 (6.8) | 0.999 |
| Female, n (%) | 2757 (58.5) | 2757 (58.5) | 0.999 |
| Race, n (%) |  |  | 0.999 |
| White | 3110 (66.0) | 3110 (66.0) |  |
| Black (not Hispanic) | 770 (16.3) | 770 (16.3) |  |
| Hispanic | 664 (14.1) | 664 (14.1) |  |
| Other/Mixed | 166 (3.5) | 166 (3.5) |  |
| Education, n (%) |  |  | 0.999 |
| ＜13 years | 896 (19.4) | 916 (19.4) |  |
| 13-16 years | 1729 (37.5) | 1758 (37.3) |  |
| ≥16years | 1990 (43.1) | 2036 (43.2) |  |
| Income, n (%) |  |  | 0.963 |
| < $20K | 481 (11.3) | 523 (11.1) |  |
| $20K - $40K | 893 (21.0) | 974 (20.7) |  |
| $40K - $60K | 868 (20.4) | 975 (20.7) |  |
| $60K - $80K | 706 (16.6) | 765 (16.2) |  |
| BMI, kg/m2 | 36.0 (5.9) | 36.0 (5.9) | 0.999 |
| Waist circumference, cm | 114.0 (14.0) | 114.0 (14.0) | 0.999 |
| SBP, mmHg | 129.0 (17.1) | 129.0 (17.1) | 0.991 |
| DBP, mmHg | 70.2 (9.6) | 70.2 (9.6) | 0.961 |
| Smoking, n (%) |  |  | 0.999 |
| Never | 2340 (49.8) | 2343 (49.7) |  |
| Former smoker | 2162 (46.0) | 2168 (46.0) |  |
| Current smoker | 199 (4.2) | 199 (4.2) |  |
| Alcohol, n (%) |  |  | 0.999 |
| Never | 3148 (66.8) | 3148 (66.8) |  |
| ≥1g/week | 1562 (33.2) | 1562 (33.2) |  |
| HbA1c, % | 7.3 (1.2) | 7.3 (1.2) | 0.999 |
| HDL-c, mg/dl | 43.5 (11.9) | 43.5 (11.9) | 0.993 |
| LDL-c, mg/dl | 112.65 (32.1) | 112.68 (32.1) | 0.963 |
| Creatinine, mg/dl | 0.8 (0.2) | 0.8 (0.2) | 0.999 |
| Hypertension, n (%) | 3943 (83.7) | 3943 (83.7) | 0.999 |
| CVD, n (%) | 660 (14.0) | 660 (14.0) | 0.999 |
| Dyslipidemia, n (%) | 3325 (70.6) | 3325 (70.6) | 0.999 |
| ACR, mg/g | 4.3 (20.3) | 4.3 (20.3) | 0.999 |
| ABI | 1.2 (0.1) | 1.2 (0.1) | 0.968 |
| Diabetes Duration, years | 6.7 (6.4) | 6.7 (6.4) | 0.999 |
| Continuous and categorical variables are presented as mean (SD) and number (%), respectively.  BMI: body mass index; SBP: systolic blood pressure; DBP: diastolic blood pressure; HbA1c: glycosylated hemoglobin; HDL-c: high-density lipoprotein cholesterol; LDL-c: low-density lipoprotein cholesterol; CVD: cardiovascular disease; ACR: albumin-creatinine ratio; ABI: ankle brachial index; SD: standard deviation. | | | |

| **Table S4.** Baseline characteristics of participants between the ILI and DSE groups. | | | |
| --- | --- | --- | --- |
| **Variables** | DSE group  (N=2358) | ILI group  (N=2352) | *P* value |
| Age, years | 59.0 (6.8) | 58.9 (6.8) | 0.096 |
| Female, n (%) | 1379 (58.5) | 1378 (58.6) | 0.964 |
| Race, n (%) |  |  | 0.936 |
| White | 1560 (66.2) | 1550 (65.9) |  |
| Black (not Hispanic) | 386 (16.4) | 384 (16.3) |  |
| Hispanic | 333 (14.1) | 331 (14.1) |  |
| Other/Mixed | 79 (3.4) | 87 (3.7) |  |
| Education, n (%) |  |  | 0.523 |
| ＜13 years | 452 (19.2) | 464 (19.7) |  |
| 13-16 years | 899 (38.1) | 859 (36.5) |  |
| ≥16years | 1007 (42.7) | 1029 (43.8) |  |
| Income, n (%) |  |  | 0.941 |
| < $20K | 258 (10.9) | 265 (11.3) |  |
| $20K - $40K | 492 (20.9) | 482 (20.5) |  |
| $40K - $60K | 482 (20.4) | 493 (21.0) |  |
| $60K - $80K | 378 (16.0) | 387 (16.5) |  |
| BMI, kg/m2 | 36.0 (5.8) | 36.0 (6.0) | 0.711 |
| Waist circumference, cm | 114.1 (13.6) | 113.9 (14.4) | 0.515 |
| SBP, mmHg | 129.7 (16.7) | 128.4 (17.2) | 0.01 |
| DBP, mmHg | 70.5 (9.6) | 70.0 (9.5) | 0.064 |
| Smoking, n (%) |  |  | 0.726 |
| Never | 1185 (50.3) | 1158 (49.2) |  |
| Former smoker | 1077 (45.7) | 1091 (46.4) |  |
| Current smoker | 96 (4.1) | 103 (4.4) |  |
| Alcohol, n (%) |  |  | 0.780 |
| Never | 1571 (66.6) | 1577 (67.0) |  |
| ≥1g/week | 787 (33.4) | 775 (33.0) |  |
| HbA1c, % | 7.3 (1.2) | 7.2 (1.1) | 0.069 |
| HDL-c, mg/dl | 43.5 (11.9) | 43.6 (12.0) | 0.885 |
| LDL-c, mg/dl | 112.8 (32.2) | 112.6 (32.0) | 0.807 |
| Creatinine, mg/dl | 0.8 (0.2) | 0.8 (0.2) | 0.564 |
| Hypertension, n (%) | 1968 (83.5) | 1975 (84.0) | 0.664 |
| CVD, n (%) | 322 (13.7) | 338 (14.4) | 0.506 |
| Dyslipidemia, n (%) | 1671 (70.9) | 1654 (70.3) | 0.707 |
| ACR, mg/g | 4.5 (22.2) | 4.2 (18.1) | 0.546 |
| ABI | 1.2 (0.1) | 1.2 (0.1) | 0.596 |
| Diabetes Duration, years | 6.8 (6.3) | 6.7 (6.5) | 0.545 |
| Continuous and categorical variables are presented as mean (SD) and number (%), respectively.  ILI: intensive lifestyle intervention; DSE: diabetes support and education; BMI: body mass index; SBP: systolic blood pressure; DBP: diastolic blood pressure; HbA1c: glycosylated hemoglobin; HDL-c: high-density lipoprotein cholesterol; LDL-c: low-density lipoprotein cholesterol; CVD: cardiovascular disease; ACR: albumin-creatinine ratio; ABI: ankle brachial index; SD: standard deviation. | | | |

| **Table S5**. Risk of primary and three secondary outcomes for the ILI vs. DSE groups in overweight or obese participants with type 2 diabetes. | | | | | | |
| --- | --- | --- | --- | --- | --- | --- |
| **Outcomes** | No. of events in DSE (%)  (N=2358) | No. of events in ILI (%)  (N=2352) | Unadjusted | | Fully adjusted | |
| HR (95% CI) | *P* value | HR (95% CI) | *P* value |
| Primary outcome | 393 (16.6) | 375 (15.9) | 0.94 (0.82-1.08) | 0.401 | 0.96 (0.83-1.11) | 0.570 |
| Secondary outcome 1 | 266 (11.2) | 249 (10.6) | 0.93 (0.78-1.10) | 0.389 | 0.96 (0.80-1.14) | 0.611 |
| Secondary outcome 2 | 497 (21.1) | 460 (19.6) | 0.91 (0.80-1.04) | 0.158 | 0.93 (0.82-1.06) | 0.276 |
| Secondary outcome 3 | 563 (23.9) | 537 (22.8) | 0.94 (0.84-1.06) | 0.307 | 0.96 (0.85-1.08) | 0.449 |
| The multivariable model was fully adjusted for age, gender, race, body mass index, glycosylated hemoglobin, low-density lipoprotein cholesterol, serum creatinine, smoking status, hypertension, and diabetes duration.  Primary outcome: the first occurrence of death from cardiovascular causes, non-fatal myocardial infarction, non-fatal stroke, or hospitalization for angina. Secondary outcome 1: death from cardiovascular causes, nonfatal myocardial infarction, or nonfatal stroke. Secondary outcome 2: death from any cause, non-fatal myocardial infarction, non-fatal stroke, or hospitalization for angina. Secondary outcome 3: death from any cause, non-fatal myocardial infarction, non-fatal stroke, hospitalization for angina, coronary-artery bypass grafting, percutaneous coronary intervention, hospitalization for heart failure, carotid endarterectomy, or peripheral vascular disease.  ILI: intensive lifestyle intervention; DSE: diabetes support and education; HR: hazard ratio; CI: confidence interval. | | | | | | |

| **Table S6.** Risk of primary and secondary cardiovascular outcomes across four subgroups identified by the causal forest model. | | | | | |
| --- | --- | --- | --- | --- | --- |
| Subgroups | No. of events (%) | Unadjusted | | Fully adjusted | |
| HR (95% CI) | *P* value | HR (95% CI) | *P* value |
| Primary outcome: Death from cardiovascular causes, non-fatal myocardial infarction, non-fatal stroke, or hospitalization for angina. | | | | | |
| Subgroup 1 | 158/1286 (12.3) | 1.01 (0.74-1.38) | 0.934 | 0.87 (0.69-1.09) | 0.228 |
| Subgroup 2 | 266/1481 (18.0) | 1.18 (0.92-1.50) | 0.187 | 0.87 (0.71-1.05) | 0.143 |
| Subgroup 3 | 160/1095 (14.6) | 0.94 (0.69-1.28) | 0.688 | 0.79 (0.63-0.98) | 0.029 |
| Subgroup 4 | 184/848 (21.7) | Reference | - | Reference | - |
| Secondary outcome 1: Death from cardiovascular causes, non-fatal myocardial infarction, non-fatal stroke. | | | | | |
| Subgroup 1 | 108/1286 (8.4) | 0.94 (0.64-1.37) | 0.733 | 0.85 (0.65-1.12) | 0.250 |
| Subgroup 2 | 175/1481 (11.8) | 1.20 (0.89-1.62) | 0.228 | 0.80 (0.63-1.00) | 0.052 |
| Subgroup 3 | 98/1095 (8.9) | 0.89 (0.60-1.33) | 0.573 | 0.67 (0.51-0.87) | 0.003 |
| Subgroup 4 | 134/848 (15.8) | Reference | - | Reference | - |
| Secondary outcome 2: Death from any cause, non-fatal myocardial infarction, non-fatal stroke, or hospitalization for angina. | | | | | |
| Subgroup 1 | 194/1286 (15.1) | 1.02 (0.77-1.35) | 0.895 | 0.83 (0.68-1.02) | 0.081 |
| Subgroup 2 | 339/1481 (22.9) | 1.11 (0.89-1.37) | 0.352 | 0.89 (0.75-1.06) | 0.202 |
| Subgroup 3 | 195/1095 (17.8) | 0.89 (0.67-1.17) | 0.393 | 0.76 (0.63-0.92) | 0.005 |
| Subgroup 4 | 229/848 (27.0) | Reference | - | Reference | - |
| Secondary outcome 3: Death from any cause, non-fatal myocardial infarction, non-fatal stroke, or hospitalization for angina, CABG, PCI, hospital admission for heart failure, carotid endarterectomy, or peripheral vascular disease. | | | | | |
| Subgroup 1 | 222/1286 (17.3) | 1.03 (0.79-1.34) | 0.823 | 0.78 (0.65-0.95) | 0.012 |
| Subgroup 2 | 383/1481 (25.9) | 1.07 (0.88-1.31) | 0.499 | 0.84 (0.72-0.99) | 0.032 |
| Subgroup 3 | 220/1095 (20.1) | 0.87 (0.67-1.14) | 0.316 | 0.69 (0.58-0.83) | <0.001 |
| Subgroup 4 | 275/848 (32.4) | Reference | - | Reference | - |
| The multivariable model was adjusted for age, gender, race, body mass index, glycosylated hemoglobin, low-density lipoprotein cholesterol, serum creatinine, smoking status, hypertension, and diabetes duration.  Subgroup 1: SF-36 Mental Health ≤ 55.64 and Diabetes Duration ≤ 4 years; Subgroup 2: SF-36 Mental Health ≤ 55.64 and Diabetes Duration > 4 years; Subgroup 3: SF-36 Mental Health > 55.64 and ACR ≤ 10 mg/g; Subgroup 4: SF-36 Mental Health > 55.64 and ACR > 10 mg/g.  HR: hazard ratio; CI: confidence interval. | | | | | |

| **Table S7.** Baseline characteristics of participants in the ILI and DSE arms within Subgroups 1 to 3. | | | | | | | | | |
| --- | --- | --- | --- | --- | --- | --- | --- | --- | --- |
| **Variables** | Subgroup 1 | | | Subgroup 2 | | | Subgroup 3 | | |
| DSE arm  (n = 615) | ILI arm  (n = 671) | *P* value | DSE arm  (n = 753) | ILI arm  (n = 728) | *P* value | DSE arm  (n = 558) | ILI arm  (n = 537) | *P* value |
| Age, years | 57.2 (6.5) | 57.3 (6.5) | 0.662 | 59.3 (6.7) | 58.5 (6.6) | 0.019 | 59.4 (6.5) | 59.7 (6.8) | 0.400 |
| Female, n (%) | 403 (63.5) | 432 (64.4) | 0.710 | 438 (58.2) | 440 (60.4) | 0.403 | 320 (57.3) | 302 (56.2) | 0.757 |
| Race, n (%) |  |  | 0.853 |  |  | 0.306 |  |  | 0.776 |
| White | 411 (66.8) | 446 (66.5) |  | 509 (67.6) | 467 (64.1) |  | 360 (64.5) | 356 (66.3) |  |
| Black (not Hispanic) | 95 (15.4) | 96 (14.3) |  | 106 (14.1) | 125 (17.2) |  | 111 (19.9) | 101 (18.8) |  |
| Hispanic | 86 (14.0) | 104 (15.5) |  | 112 (14.9) | 105 (14.4) |  | 70 (12.5) | 60 (11.2) |  |
| Other/Mixed | 23 (3.7) | 25 (3.7) |  | 26 (3.5) | 31 (4.3) |  | 17 (3.0) | 20 (3.7) |  |
| Education, n (%) |  |  | 0.377 |  |  | 0.867 |  |  | 0.584 |
| ＜13 years | 105 (17.1) | 134 (20.0) |  | 160 (21.2) | 154 (21.2) |  | 97 (17.4) | 96 (17.9) |  |
| 13-16 years | 229 (37.2) | 248 (37.0) |  | 283 (37.6) | 265 (36.4) |  | 212 (38.0) | 188 (35.0) |  |
| ≥16years | 281 (45.7) | 289 (43.1) |  | 310 (41.2) | 309 (42.4) |  | 249 (44.6) | 253 (47.1) |  |
| Income, n (%) |  |  | 0.184 |  |  | 0.641 |  |  | 0.134 |
| < $20K | 64 (10.4) | 91 (13.6) |  | 97 (12.9) | 86 (11.8) |  | 53 (9.3) | 45 (8.4) |  |
| $20K - $40K | 120 (19.5) | 151 (22.5) |  | 169 (22.4) | 156 (21.4) |  | 117 (21.0) | 89 (16.6) |  |
| $40K - $60K | 139 (22.6) | 130 (19.4) |  | 158 (21.0) | 160 (22.0) |  | 97 (17.4) | 122 (22.7) |  |
| $60K - $80K | 96 (15.6) | 98 (14.6) |  | 106 (14.1) | 121 (16.6) |  | 96 (17.2) | 95 (17.7) |  |
| BMI, kg/m2 | 36.1 (6.1) | 36.2 (6.1) | 0.714 | 36.1 (5.8) | 36.0 (6.1) | 0.720 | 35.7 (5.4) | 35.1 (5.7) | 0.058 |
| Waist circumference, cm | 113.1 (13.5) | 113.4 (14.6) | 0.769 | 114.8 (13.7) | 114.2 (14.0) | 0.414 | 112.9 (13.1) | 111.7 (13.8) | 0.142 |
| SBP, mmHg | 129.4 (17.0) | 127.7 (16.6) | 0.080 | 130.1 (16.6) | 128.6 (17.8) | 0.083 | 127.0 (16.6) | 126.2 (16.8) | 0.419 |
| DBP, mmHg | 71.5 (9.6) | 70.5 (9.2) | 0.043 | 69.5 (9.7) | 69.3 (9.3) | 0.716 | 70.0 (9.1) | 69.4 (9.7) | 0.297 |
| Smoking, n (%) |  |  | 0.497 |  |  | 0.191 |  |  | 0.978 |
| Never | 318 (51.7) | 325 (48.4) |  | 377 (50.1) | 379 (52.1) |  | 287 (51.4) | 273 (50.8) |  |
| Former smoker | 265 (43.1) | 310 (46.2) |  | 351(46.6) | 314 (43.1) |  | 254 (45.5) | 247 (46.0) |  |
| Current smoker | 32 (5.2) | 36 (5.4) |  | 25 (3.3) | 35 (4.8) |  | 17 (3.0) | 17 (3.2) |  |
| Alcohol, n (%) |  |  | 0.752 |  |  | 0.879 |  |  | 0.752 |
| Never | 399 (64.9) | 442 (65.9) |  | 523 (69.5) | 502 (69.0) |  | 377 (67.6) | 357 (66.5) |  |
| ≥1g/week | 216 (35.1) | 229 (34.1) |  | 230 (30.5) | 226 (31.0) |  | 181 (32.4) | 180 (33.5) |  |
| HbA1c, % | 7.0 (1.1) | 6.9 (1.0) | 0.144 | 7.6 (1.2) | 7.6 (1.1) | 0.820 | 7.1 (1.0) | 7.1 (1.1) | 0.596 |
| HDL-c, mg/dl | 43.8 (11.9) | 44.0 (11.6) | 0.696 | 43.2 (11.6) | 43.2 (12.4) | 0.975 | 44.6 (12.4) | 44.1 (12.0) | 0.555 |
| LDL-c, mg/dl | 117.1 (31.7) | 117.5 (33.1) | 0.819 | 109.5 (31.5) | 111.2 (32.2) | 0.305 | 114.0 (31.2) | 111.6 (29.7) | 0.187 |
| Creatinine, mg/dl | 0.8 (0.2) | 0.8 (0.2) | 0.872 | 0.8 (0.2) | 0.8 (0.2) | 0.910 | 0.8 (0.2) | 0.8 (0.2) | 0.891 |
| Hypertension, n (%) | 491 (79.8) | 533 (79.4) | 0.912 | 662 (87.9) | 637 (87.5) | 0.870 | 434 (77.8) | 434 (80.8) | 0.243 |
| CVD, n (%) | 55 (8.9) | 65 (9.7) | 0.717 | 114 (15.1) | 119 (16.3) | 0.571 | 67 (12.0) | 77 (14.3) | 0.293 |
| Dyslipidemia, n (%) | 409 (66.5) | 455 (67.8) | 0.661 | 539 (71.6) | 523 (71.8) | 0.957 | 407 (72.9) | 369 (68.7) | 0.141 |
| ACR, mg/g | 2.6 (10.1) | 2.8 (11.0) | 0.761 | 6.9 (34.7) | 4.8 (16.8) | 0.142 | 0.6 (0.2) | 0.6 (0.2) | 0.790 |
| ABI | 1.2 (0.1) | 1.2 (0.1) | 0.525 | 1.2 (0.1) | 1.2 (0.1) | 0.362 | 1.2 (0.1) | 1.2 (0.1) | 0.704 |
| Diabetes Duration, years | 2.1 (1.3) | 2.0 (1.3) | 0.081 | 10.8 (6.2) | 10.8 (6.5) | 0.845 | 5.9 (5.5) | 6.5 (6.3) | 0.102 |
| Continuous and categorical variables are presented as mean (SD) and number (%), respectively.  Subgroup 1: SF-36 Mental Health ≤ 55.64 and Diabetes Duration ≤ 4 years; Subgroup 2: SF-36 Mental Health ≤ 55.64 and Diabetes Duration > 4 years; Subgroup 3: SF-36 Mental Health > 55.64 and ACR ≤ 10 mg/g.  ILI: intensive lifestyle intervention; DSE: diabetes support and education; BMI: body mass index; SBP: systolic blood pressure; DBP: diastolic blood pressure; HbA1c: glycosylated hemoglobin; HDL-c: high-density lipoprotein cholesterol; LDL-c: low-density lipoprotein cholesterol; CVD: cardiovascular disease; ACR: albumin-creatinine ratio; ABI: ankle brachial index; SD: standard deviation. | | | | | | | | | |

| **Table S8.** Risk of primary and three secondary outcomes for ILI vs. DSE within each subgroup identified by the causal forest model after excluding those with a history of CVD at baseline (n=4050). | | | | | | |
| --- | --- | --- | --- | --- | --- | --- |
| Subgroups | No. of events in ILI (%) | No. of events in DSE (%) | Unadjusted | | Fully adjusted | |
| HR (95% CI) | *P* value | HR (95%CI) | *P* value |
| Primary outcome: Death from cardiovascular causes, non-fatal myocardial infarction, non-fatal stroke, or hospitalization for angina. | | | | | | |
| Subgroup 1 | 56/560 (10.0) | 54/606 (8.9) | 0.90 (0.62-1.31) | 0.593 | 0.91 (0.62-1.33) | 0.613 |
| Subgroup 2 | 87/609 (14.3) | 84/639 (13.1) | 1.04 (0.77-1.41) | 0.777 | 1.09 (0.81-1.48) | 0.561 |
| Subgroup 3 | 42/460 (9.1) | 58/491 (11.8) | 0.74 (0.50-1.10) | 0.135 | 0.71 (0.48-1.06) | 0.098 |
| Subgroup 4 | 39/339 (11.5) | 61/346 (17.6) | 0.63 (0.42-0.94) | 0.025 | 0.66 (0.44-1.00) | 0.048 |
| Secondary outcome 1: Death from cardiovascular causes, non-fatal myocardial infarction, non-fatal stroke. | | | | | | |
| Subgroup 1 | 42/560 (7.5) | 35/606 (5.8) | 0.78 (0.50-1.22) | 0.271 | 0.77 (0.49-1.22) | 0.265 |
| Subgroup 2 | 55/609 (9.0) | 53/639 (8.3) | 1.05 (0.72-1.53) | 0.796 | 1.14 (0.78-1.67) | 0.493 |
| Subgroup 3 | 26/460 (5.7) | 37/491 (7.5) | 0.72 (0.44-1.19) | 0.204 | 0.69 (0.42-1.15) | 0.693 |
| Subgroup 4 | 25/339 (7.4) | 42/346 (12.1) | 0.59 (0.36-0.97) | 0.039 | 0.64 (0.39-1.06) | 0.080 |
| Secondary outcome 2: Death from any cause, non-fatal myocardial infarction, non-fatal stroke, or hospitalization for angina. | | | | | | |
| Subgroup 1 | 72/560 (12.9) | 71/606 (11.7) | 0.92 (0.66-1.28) | 0.628 | 0.94 (0.67-1.30) | 0.693 |
| Subgroup 2 | 115/609 (18.9) | 117/639 (18.3) | 0.99 (0.77-1.28) | 0.952 | 1.04 (0.80-1.35) | 0.771 |
| Subgroup 3 | 53/460 (11.5) | 75/491 (15.3) | 0.72 (0.51-1.02) | 0.068 | 0.69 (0.49-0.99) | 0.044 |
| Subgroup 4 | 54/339 (15.9) | 81/346 (23.4) | 0.66 (0.47-0.93) | 0.017 | 0.68 (0.48-0.97) | 0.031 |
| Secondary outcome 3: Death from any cause, non-fatal myocardial infarction, non-fatal stroke, or hospitalization for angina, CABG, PCI, hospital admission for heart failure, carotid endarterectomy, or peripheral vascular disease. | | | | | | |
| Subgroup 1 | 79/560 (14.1) | 82/606 (13.5) | 0.97 (0.71-1.33) | 0.860 | 0.99 (0.73-1.36) | 0.962 |
| Subgroup 2 | 129/609 (21.2) | 133/639 (20.8) | 0.98 (0.77-1.25) | 0.879 | 1.03 (0.81-1.31) | 0.811 |
| Subgroup 3 | 61/460 (13.3) | 83/491 (16.9) | 0.75 (0.54-1.04) | 0.086 | 0.73 (0.53-1.03) | 0.070 |
| Subgroup 4 | 79/339 (23.3) | 90/346 (26.0) | 0.88 (0.65-1.19) | 0.413 | 0.90 (0.66-1.22) | 0.496 |
| The multivariable model was adjusted for age, gender, race, body mass index, glycosylated hemoglobin, low-density lipoprotein cholesterol, serum creatinine, smoking status, hypertension, and diabetes duration.  Subgroup 1: SF-36 Mental Health ≤ 55.64 and Diabetes Duration ≤ 4 years; Subgroup 2: SF-36 Mental Health ≤ 55.64 and Diabetes Duration > 4 years; Subgroup 3: SF-36 Mental Health > 55.64 and ACR ≤ 10 mg/g; Subgroup 4: SF-36 Mental Health > 55.64 and ACR > 10 mg/g.  ILI: intensive lifestyle intervention; DSE: diabetes support and education; HR: hazard ratio; CI: confidence interval. | | | | | | |
